# Supplementary material
Source: Springer Nature journal article supplement (https://www.springerprofessional.de/resource/supplementary/13638_2013_1075_MOESM3_ESM.pdf/11899024)

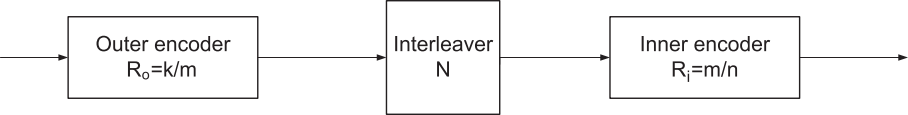

Outer encoder

$$R_o = k/m$$

Interleaver

$N$

Inner encoder

$$R_i = m/n$$

Supplement: MOESM3 [file 11899024]
